# Supplementary material for: Belowground fungal community diversity, composition and ecological functionality associated with winter wheat in conventional and organic agricultural systems
Source: PeerJ. 2020 Oct 13;8:e9732. doi: 10.7717/peerj.9732 (PMC7566770; doi:10.7717/peerj.9732)
Supplement: Supplemental Information 4 — Extended results for Table 1 [file peerj-08-9732-s004.pdf]

Table 1: Tes

|    |          |    | taxonomy | species                     | guild                                                                                    | trophic mode                      | farming system | agricultural field | plot | taxonomy path                                                                                                                                                                                                                                                                                                         |
|----|----------|----|----------|-----------------------------|------------------------------------------------------------------------------------------|-----------------------------------|----------------|--------------------|------|-----------------------------------------------------------------------------------------------------------------------------------------------------------------------------------------------------------------------------------------------------------------------------------------------------------------------|
| 1  | KY430446 | 7  | 159639   | Helotiales incertae sedis   | -                                                                                        | -                                 | Conventional   | C1                 | G    | root; cellular organisms; [SK] Eukaryota; Opisthokonta; [K] Fungi; Dikarya; [P] Ascomycota; saccharomyceta; Pezizomycotina; leotiomyceta; sordariomyceta; [C] Leotiomycetes; [O] Helotiales; Helotiales incertae sedis;                                                                                               |
| 2  | KY430447 | 7  | 4890     | Ascomycota                  | -                                                                                        | -                                 | Organic        | O2                 | G    | root; cellular organisms; [SK] Eukaryota; Opisthokonta; [K] Fungi; Dikarya; [P] Ascomycota;                                                                                                                                                                                                                           |
| 3  | KY430448 | 7  | 4890     | Ascomycota                  | -                                                                                        | -                                 | Organic        | O2                 | G    | root; cellular organisms; [SK] Eukaryota; Opisthokonta; [K] Fungi; Dikarya; [P] Ascomycota;                                                                                                                                                                                                                           |
| 4  | KY430449 | 7  | 4890     | Ascomycota                  | -                                                                                        | -                                 | Organic        | O2                 | I    | root; cellular organisms; [SK] Eukaryota; Opisthokonta; [K] Fungi; Dikarya; [P] Ascomycota;                                                                                                                                                                                                                           |
| 5  | KY430451 | 19 | 252155   | Schizothecium               | Dung Saprotroph                                                                          | Saprotroph                        | Conventional   | C3                 | J    | root; cellular organisms; [SK] Eukaryota; Opisthokonta; [K] Fungi; Dikarya; [P] Ascomycota; saccharomyceta; Pezizomycotina; leotiomyceta; sordariomyceta; [C] Sordariomycetes; Sordariomycetidae; [O] Sordariales; [F] Lasiosphaeriaceae; [G] Schizothecium;                                                          |
| 6  | KY430452 | 38 | 39397    | Candida sake                | Undefined Saprotroph                                                                     | Saprotroph                        | Organic        | O2                 | I    | root; cellular organisms; [SK] Eukaryota; Opisthokonta; [K] Fungi; Dikarya; [P] Ascomycota; saccharomyceta; Saccharomycotina; [C] Saccharomycetes; [O] Saccharomycetales; Saccharomycetales incertae sedis; [G] Candida; [S] Candida sake;                                                                            |
| 7  | KY430453 | 38 | 39397    | Candida sake                | Undefined Saprotroph                                                                     | Saprotroph                        | Organic        | O2                 | E    | root; cellular organisms; [SK] Eukaryota; Opisthokonta; [K] Fungi; Dikarya; [P] Ascomycota; saccharomyceta; Saccharomycotina; [C] Saccharomycetes; [O] Saccharomycetales; Saccharomycetales incertae sedis; [G] Candida; [S] Candida sake;                                                                            |
| 8  | KY430454 | 27 | 715340   | Pleosporinae                | -                                                                                        | -                                 | Conventional   | C1                 | G    | root; cellular organisms; [SK] Eukaryota; Opisthokonta; [K] Fungi; Dikarya; [P] Ascomycota; saccharomyceta; Pezizomycotina; leotiomyceta; dothideomyceta; [C] Dothideomycetes; Pleosporomycetidae; [O] Pleosporales; Pleosporinae; [F] Didymellaceae;                                                                 |
| 9  | KY430455 | 29 | 683158   | Didymellaceae               | Animal Pathogen-Plant Pathogen-Undefined Saprotroph                                      | Pathotroph-Saprotroph             | Conventional   | C1                 | E    | root; cellular organisms; [SK] Eukaryota; Opisthokonta; [K] Fungi; Dikarya; [P] Ascomycota; saccharomyceta; Pezizomycotina; leotiomyceta; dothideomyceta; [C] Dothideomycetes; Pleosporomycetidae; [O] Pleosporales; Pleosporinae; [F] Didymellaceae;                                                                 |
| 10 | KY430456 | 29 | 715340   | Pleosporinae                | -                                                                                        | -                                 | Organic        | O1                 | C    | root; cellular organisms; [SK] Eukaryota; Opisthokonta; [K] Fungi; Dikarya; [P] Ascomycota; saccharomyceta; Pezizomycotina; leotiomyceta; dothideomyceta; [C] Dothideomycetes; Pleosporomycetidae; [O] Pleosporales; Pleosporinae; [F] Didymellaceae;                                                                 |
| 11 | KY430457 | 20 | 67608    | Microdochium                | Endophyte-Plant Pathogen                                                                 | Pathotroph-Symbiotroph            | Organic        | O2                 | A    | root; cellular organisms; [SK] Eukaryota; Opisthokonta; [K] Fungi; Dikarya; [P] Ascomycota; saccharomyceta; Pezizomycotina; leotiomyceta; sordariomyceta; [C] Sordariomycetes; Xylariomycetidae; [O] Xylariales; [F] Microdochiaceae; [G] Microdochium;                                                               |
| 12 | KY430458 | 20 | 67608    | Microdochium                | Endophyte-Plant Pathogen                                                                 | Pathotroph-Symbiotroph            | Conventional   | C2                 | F    | root; cellular organisms; [SK] Eukaryota; Opisthokonta; [K] Fungi; Dikarya; [P] Ascomycota; saccharomyceta; Pezizomycotina; leotiomyceta; sordariomyceta; [C] Sordariomycetes; Xylariomycetidae; [O] Xylariales; [F] Microdochiaceae; [G] Microdochium;                                                               |
| 13 | KY430459 | 20 | 67608    | Microdochium                | Endophyte-Plant Pathogen                                                                 | Pathotroph-Symbiotroph            | Conventional   | C3                 | F    | root; cellular organisms; [SK] Eukaryota; Opisthokonta; [K] Fungi; Dikarya; [P] Ascomycota; saccharomyceta; Pezizomycotina; leotiomyceta; sordariomyceta; [C] Sordariomycetes; Xylariomycetidae; [O] Xylariales; [F] Microdochiaceae; [G] Microdochium;                                                               |
| 14 | KY430460 | 20 | 67608    | Microdochium                | Endophyte-Plant Pathogen                                                                 | Pathotroph-Symbiotroph            | Conventional   | C2                 | F    | root; cellular organisms; [SK] Eukaryota; Opisthokonta; [K] Fungi; Dikarya; [P] Ascomycota; saccharomyceta; Pezizomycotina; leotiomyceta; sordariomyceta; [C] Sordariomycetes; Xylariomycetidae; [O] Xylariales; [F] Microdochiaceae; [G] Microdochium;                                                               |
| 15 | KY430461 | 20 | 67608    | Microdochium                | Endophyte-Plant Pathogen                                                                 | Pathotroph-Symbiotroph            | Conventional   | C2                 | E    | root; cellular organisms; [SK] Eukaryota; Opisthokonta; [K] Fungi; Dikarya; [P] Ascomycota; saccharomyceta; Pezizomycotina; leotiomyceta; sordariomyceta; [C] Sordariomycetes; Xylariomycetidae; [O] Xylariales; [F] Microdochiaceae; [G] Microdochium;                                                               |
| 16 | KY430462 | 20 | 67608    | Microdochium                | Endophyte-Plant Pathogen                                                                 | Pathotroph-Symbiotroph            | Organic        | O2                 | H    | root; cellular organisms; [SK] Eukaryota; Opisthokonta; [K] Fungi; Dikarya; [P] Ascomycota; saccharomyceta; Pezizomycotina; leotiomyceta; sordariomyceta; [C] Sordariomycetes; Xylariomycetidae; [O] Xylariales; [F] Microdochiaceae; [G] Microdochium;                                                               |
| 17 | KY430463 | 35 | 1895944  | Vishniacozyma victoriae     | Fungal Parasite-Undefined Saprotroph                                                     | Pathotroph-Saprotroph-Symbiotroph | Organic        | O2                 | I    | root; cellular organisms; [SK] Eukaryota; Opisthokonta; [K] Fungi; Dikarya; [P] Basidiomycota; Agaricomycotina; [C] Tremellomycetes; [O] Tremellales; [F] Bulleribasidiaceae; [G] Vishniacozyma; [S] Vishniacozyma victoriae;                                                                                         |
| 18 | KY430465 | 6  | 155619   | Agaricomycetes              | -                                                                                        | -                                 | Organic        | O1                 | I    | root; cellular organisms; [SK] Eukaryota; Opisthokonta; [K] Fungi; Dikarya; [P] Basidiomycota; Agaricomycotina; [C] Agaricomycetes;                                                                                                                                                                                   |
| 19 | KY430466 | 35 | 1895944  | Vishniacozyma victoriae     | Fungal Parasite-Undefined Saprotroph                                                     | Pathotroph-Saprotroph-Symbiotroph | Conventional   | C3                 | I    | root; cellular organisms; [SK] Eukaryota; Opisthokonta; [K] Fungi; Dikarya; [P] Basidiomycota; Agaricomycotina; [C] Tremellomycetes; [O] Tremellales; [F] Bulleribasidiaceae; [G] Vishniacozyma; [S] Vishniacozyma victoriae;                                                                                         |
| 20 | KY430467 | 5  | 5209     | Filobasidium                | Undefined Saprotroph                                                                     | Saprotroph                        | Conventional   | C1                 | G    | root; cellular organisms; [SK] Eukaryota; Opisthokonta; [K] Fungi; Dikarya; [P] Basidiomycota; Agaricomycotina; [C] Filobasidiales; [F] Filobasidiaceae; [G] Filobasidium;                                                                                                                                            |
| 21 | KY430468 | 5  | 5209     | Filobasidium                | Undefined Saprotroph                                                                     | Saprotroph                        | Organic        | O1                 | E    | root; cellular organisms; [SK] Eukaryota; Opisthokonta; [K] Fungi; Dikarya; [P] Basidiomycota; Agaricomycotina; [C] Tremellomycetes; [O] Filobasidiales; [F] Filobasidiaceae; [G] Filobasidium;                                                                                                                       |
| 22 | KY430469 | 20 | 67608    | Microdochium                | Endophyte-Plant Pathogen                                                                 | Pathotroph-Symbiotroph            | Conventional   | C3                 | E    | root; cellular organisms; [SK] Eukaryota; Opisthokonta; [K] Fungi; Dikarya; [P] Ascomycota; saccharomyceta; Pezizomycotina; leotiomyceta; sordariomyceta; [C] Sordariomycetes; Xylariomycetidae; [O] Xylariales; [F] Microdochiaceae; [G] Microdochium;                                                               |
| 23 | KY430470 | 20 | 67608    | Microdochium                | Endophyte-Plant Pathogen                                                                 | Pathotroph-Symbiotroph            | Conventional   | C3                 | D    | root; cellular organisms; [SK] Eukaryota; Opisthokonta; [K] Fungi; Dikarya; [P] Ascomycota; saccharomyceta; Pezizomycotina; leotiomyceta; sordariomyceta; [C] Sordariomycetes; Xylariomycetidae; [O] Xylariales; [F] Microdochiaceae; [G] Microdochium;                                                               |
| 24 | KY430471 | 7  | 4890     | Ascomycota                  | -                                                                                        | -                                 | Organic        | O3                 | G    | root; cellular organisms; [SK] Eukaryota; Opisthokonta; [K] Fungi; Dikarya; [P] Ascomycota;                                                                                                                                                                                                                           |
| 25 | KY430472 | 31 | 1621986  | Darksidea                   | Endophyte                                                                                | -                                 | Organic        | O1                 | F    | root; cellular organisms; [SK] Eukaryota; Opisthokonta; [K] Fungi; Dikarya; [P] Ascomycota; saccharomyceta; Pezizomycotina; leotiomyceta; dothideomyceta; [C] Dothideomycetes; Pleosporomycetidae; [O] Pleosporales; Massarinaceae; [F] Lentitheciaceae; [G] Darksidea;                                               |
| 26 | KY430473 | 26 | 61235    | Fusarium equiseti           | Animal Pathogen-Endophyte-Lichen Parasite-Plant Pathogen-Soil Saprotroph-Wood Saprotroph | Pathotroph-Saprotroph-Symbiotroph | Conventional   | C1                 | B    | root; cellular organisms; [SK] Eukaryota; Opisthokonta; [K] Fungi; Dikarya; [P] Ascomycota; saccharomyceta; Pezizomycotina; leotiomyceta; sordariomyceta; [C] Sordariomycetes; Hypocromycetidae; [O] Hypocreales; [F] Nectriaceae; [G] Fusarium; Fusarium incarnatum-equiseti species complex; [S] Fusarium equiseti; |
| 27 | KY430474 | 36 | 4890     | Ascomycota                  | -                                                                                        | -                                 | Organic        | O3                 | I    | root; cellular organisms; [SK] Eukaryota; Opisthokonta; [K] Fungi; Dikarya; [P] Ascomycota;                                                                                                                                                                                                                           |
| 28 | KY430475 | 20 | 67608    | Microdochium                | Endophyte-Plant Pathogen                                                                 | Pathotroph-Symbiotroph            | Organic        | O2                 | I    | root; cellular organisms; [SK] Eukaryota; Opisthokonta; [K] Fungi; Dikarya; [P] Ascomycota; saccharomyceta; Pezizomycotina; leotiomyceta; sordariomyceta; [C] Sordariomycetes; Xylariomycetidae; [O] Xylariales; [F] Microdochiaceae; [G] Microdochium;                                                               |
| 29 | KY430476 | 26 | 61235    | Fusarium equiseti           | Animal Pathogen-Endophyte-Lichen Parasite-Plant Pathogen-Soil Saprotroph-Wood Saprotroph | Pathotroph-Saprotroph-Symbiotroph | Conventional   | C1                 | B    | root; cellular organisms; [SK] Eukaryota; Opisthokonta; [K] Fungi; Dikarya; [P] Ascomycota; saccharomyceta; Pezizomycotina; leotiomyceta; sordariomyceta; [C] Sordariomycetes; Hypocromycetidae; [O] Hypocreales; [F] Nectriaceae; [G] Fusarium; Fusarium incarnatum-equiseti species complex; [S] Fusarium equiseti; |
| 30 | KY430477 | 26 | 61235    | Fusarium equiseti           | Animal Pathogen-Endophyte-Lichen Parasite-Plant Pathogen-Soil Saprotroph-Wood Saprotroph | Pathotroph-Saprotroph-Symbiotroph | Conventional   | C1                 | B    | root; cellular organisms; [SK] Eukaryota; Opisthokonta; [K] Fungi; Dikarya; [P] Ascomycota; saccharomyceta; Pezizomycotina; leotiomyceta; sordariomyceta; [C] Sordariomycetes; Hypocromycetidae; [O] Hypocreales; [F] Nectriaceae; [G] Fusarium; Fusarium incarnatum-equiseti species complex; [S] Fusarium equiseti; |
| 31 | KY430478 | 33 | 5114     | Podospora                   | Dung Saprotroph-Endophyte-Litter Saprotroph-Undefined Saprotroph                         | Saprotroph-Symbiotroph            | Organic        | O1                 | F    | root; cellular organisms; [SK] Eukaryota; Opisthokonta; [K] Fungi; Dikarya; [P] Ascomycota; saccharomyceta; Pezizomycotina; leotiomyceta; sordariomyceta; [C] Sordariomycetes; Sordariomycetidae; [O] Sordariales; [F] Lasiosphaeriaceae; [G] Podospora;                                                              |
| 32 | KY430479 | 8  | 89926    | Cystofilobasidium macerans  | Leaf Saprotroph                                                                          | Saprotroph                        | Organic        | O1                 | F    | root; cellular organisms; [SK] Eukaryota; Opisthokonta; [K] Fungi; Dikarya; [P] Basidiomycota; Agaricomycotina; [C] Tremellomycetes; [O] Cystofilobasidiales; [F] Cystofilobasidiaceae; [G] Cystofilobasidium; [S] Cystofilobasidium macerans;                                                                        |
| 33 | KY430480 | 20 | 67608    | Microdochium                | Endophyte-Plant Pathogen                                                                 | Pathotroph-Symbiotroph            | Conventional   | C2                 | G    | root; cellular organisms; [SK] Eukaryota; Opisthokonta; [K] Fungi; Dikarya; [P] Ascomycota; saccharomyceta; Pezizomycotina; leotiomyceta; sordariomyceta; [C] Sordariomycetes; Xylariomycetidae; [O] Xylariales; [F] Microdochiaceae; [G] Microdochium;                                                               |
| 34 | KY430481 | 4  | 5303     | Polyporales                 | -                                                                                        | -                                 | Organic        | O2                 | J    | root; cellular organisms; [SK] Eukaryota; Opisthokonta; [K] Fungi; Dikarya; [P] Basidiomycota; Agaricomycotina; [C] Agaricomycetes; Agaricomycetes incertae sedis; [O] Polyporales;                                                                                                                                   |
| 35 | KY430482 | 1  | 475069   | Botryosphaeriales           | -                                                                                        | -                                 | Organic        | O3                 | G    | root; cellular organisms; [SK] Eukaryota; Opisthokonta; [K] Fungi; Dikarya; [P] Ascomycota; saccharomyceta; Pezizomycotina; leotiomyceta; dothideomyceta; [C] Dothideomycetes; Dothideomycetes incertae sedis; [O] Botryosphaeriales;                                                                                 |
| 36 | KY430483 | 13 | 715298   | Lentitheciaceae             | -                                                                                        | -                                 | Organic        | O2                 | J    | root; cellular organisms; [SK] Eukaryota; Opisthokonta; [K] Fungi; Dikarya; [P] Ascomycota; saccharomyceta; Pezizomycotina; leotiomyceta; dothideomyceta; [C] Dothideomycetes; Pleosporomycetidae; [O] Pleosporales; Massarinaceae; [F] Lentitheciaceae;                                                              |
| 37 | KY430484 | 5  | 5209     | Filobasidium                | Undefined Saprotroph                                                                     | Saprotroph                        | Organic        | O2                 | I    | root; cellular organisms; [SK] Eukaryota; Opisthokonta; [K] Fungi; Dikarya; [P] Basidiomycota; Agaricomycotina; [C] Tremellomycetes; [O] Filobasidiales; [F] Filobasidiaceae; [G] Filobasidium;                                                                                                                       |
| 38 | KY430485 | 7  | 4890     | Ascomycota                  | -                                                                                        | -                                 | Organic        | O2                 | I    | root; cellular organisms; [SK] Eukaryota; Opisthokonta; [K] Fungi; Dikarya; [P] Ascomycota;                                                                                                                                                                                                                           |
| 39 | KY430487 | 24 | 147548   | Leotiomycetes               | -                                                                                        | -                                 | Organic        | O2                 | H    | root; cellular organisms; [SK] Eukaryota; Opisthokonta; [K] Fungi; Dikarya; [P] Ascomycota; saccharomyceta; Pezizomycotina; leotiomyceta; sordariomyceta; [C] Leotiomycetes;                                                                                                                                          |
| 40 | KY430488 | 7  | 4890     | Ascomycota                  | -                                                                                        | -                                 | Organic        | O2                 | F    | root; cellular organisms; [SK] Eukaryota; Opisthokonta; [K] Fungi; Dikarya; [P] Ascomycota;                                                                                                                                                                                                                           |
| 41 | KY430489 | 30 | 4890     | Ascomycota                  | -                                                                                        | -                                 | Organic        | O2                 | E    | root; cellular organisms; [SK] Eukaryota; Opisthokonta; [K] Fungi; Dikarya; [P] Ascomycota;                                                                                                                                                                                                                           |
| 42 | KY430490 | 15 | 92863    | Helminthosporium velutinum  | Fungal Parasite-Plant Pathogen                                                           | Pathotroph                        | Organic        | O2                 | E    | root; cellular organisms; [SK] Eukaryota; Opisthokonta; [K] Fungi; Dikarya; [P] Ascomycota; saccharomyceta; Pezizomycotina; leotiomyceta; dothideomyceta; [C] Dothideomycetes; Pleosporomycetidae; [O] Pleosporales; Massarinaceae; [F] Massarinaceae; [G] Helminthosporium; [S] Helminthosporium velutinum;          |
| 43 | KY430491 | 34 | 151289   | Vishniacozyma tephrensis    | Fungal Parasite-Undefined Saprotroph                                                     | Pathotroph-Saprotroph-Symbiotroph | Organic        | O2                 | E    | root; cellular organisms; [SK] Eukaryota; Opisthokonta; [K] Fungi; Dikarya; [P] Basidiomycota; Agaricomycotina; [C] Tremellomycetes; [O] Tremellales; [F] Bulleribasidiaceae; [G] Vishniacozyma; [S] Vishniacozyma tephrensis;                                                                                        |
| 44 | KY430492 | 7  | 4890     | Ascomycota                  | -                                                                                        | -                                 | Conventional   | C2                 | J    | root; cellular organisms; [SK] Eukaryota; Opisthokonta; [K] Fungi; Dikarya; [P] Ascomycota;                                                                                                                                                                                                                           |
| 45 | KY430493 | 20 | 67608    | Microdochium                | Endophyte-Plant Pathogen                                                                 | Pathotroph-Symbiotroph            | Conventional   | C1                 | E    | root; cellular organisms; [SK] Eukaryota; Opisthokonta; [K] Fungi; Dikarya; [P] Ascomycota; saccharomyceta; Pezizomycotina; leotiomyceta; sordariomyceta; [C] Sordariomycetes; Xylariomycetidae; [O] Xylariales; [F] Microdochiaceae; [G] Microdochium;                                                               |
| 46 | KY430494 | 20 | 67608    | Microdochium                | Endophyte-Plant Pathogen                                                                 | Pathotroph-Symbiotroph            | Organic        | O2                 | H    | root; cellular organisms; [SK] Eukaryota; Opisthokonta; [K] Fungi; Dikarya; [P] Ascomycota; saccharomyceta; Pezizomycotina; leotiomyceta; sordariomyceta; [C] Sordariomycetes; Xylariomycetidae; [O] Xylariales; [F] Microdochiaceae; [G] Microdochium;                                                               |
| 47 | KY430496 | 7  | 4890     | Ascomycota                  | -                                                                                        | -                                 | Organic        | O2                 | B    | root; cellular organisms; [SK] Eukaryota; Opisthokonta; [K] Fungi; Dikarya; [P] Ascomycota;                                                                                                                                                                                                                           |
| 48 | KY430497 | 20 | 67608    | Microdochium                | Endophyte-Plant Pathogen                                                                 | Pathotroph-Symbiotroph            | Conventional   | C3                 | H    | root; cellular organisms; [SK] Eukaryota; Opisthokonta; [K] Fungi; Dikarya; [P] Ascomycota; saccharomyceta; Pezizomycotina; leotiomyceta; sordariomyceta; [C] Sordariomycetes; Xylariomycetidae; [O] Xylariales; [F] Microdochiaceae; [G] Microdochium;                                                               |
| 49 | KY430498 | 14 | 27381    | Funneliformis mosseae       | Arbuscular Mycorrhizal                                                                   | Symbiotroph                       | Organic        | O1                 | I    | root; cellular organisms; [SK] Eukaryota; Opisthokonta; [K] Fungi; [P] Micromycota; Glomeromycotina; [C] Glomeromycetes; [O] Glomerales; [F] Glomeraceae; [G] Funneliformis; [S] Funneliformis mosseae;                                                                                                               |
| 50 | KY430499 | 7  | 4890     | Ascomycota                  | -                                                                                        | -                                 | Organic        | O1                 | E    | root; cellular organisms; [SK] Eukaryota; Opisthokonta; [K] Fungi; Dikarya; [P] Ascomycota;                                                                                                                                                                                                                           |
| 51 | KY430500 | 35 | 1895944  | Vishniacozyma victoriae     | Fungal Parasite-Undefined Saprotroph                                                     | Pathotroph-Saprotroph-Symbiotroph | Conventional   | C3                 | J    | root; cellular organisms; [SK] Eukaryota; Opisthokonta; [K] Fungi; Dikarya; [P] Basidiomycota; Agaricomycotina; [C] Tremellomycetes; [O] Tremellales; [F] Bulleribasidiaceae; [G] Vishniacozyma; [S] Vishniacozyma victoriae;                                                                                         |
| 52 | KY430501 | 7  | 4890     | Ascomycota                  | -                                                                                        | -                                 | Conventional   | C1                 | G    | root; cellular organisms; [SK] Eukaryota; Opisthokonta; [K] Fungi; Dikarya; [P] Ascomycota;                                                                                                                                                                                                                           |
| 53 | KY430502 | 7  | 4890     | Ascomycota                  | -                                                                                        | -                                 | Organic        | O1                 | I    | root; cellular organisms; [SK] Eukaryota; Opisthokonta; [K] Fungi; Dikarya; [P] Ascomycota;                                                                                                                                                                                                                           |
| 54 | KY430503 | 20 | 67608    | Microdochium                | Endophyte-Plant Pathogen                                                                 | Pathotroph-Symbiotroph            | Conventional   | C1                 | I    | root; cellular organisms; [SK] Eukaryota; Opisthokonta; [K] Fungi; Dikarya; [P] Ascomycota; saccharomyceta; Pezizomycotina; leotiomyceta; sordariomyceta; [C] Sordariomycetes; Xylariomycetidae; [O] Xylariales; [F] Microdochiaceae; [G] Microdochium;                                                               |
| 55 | KY430504 | 7  | 4890     | Ascomycota                  | -                                                                                        | -                                 | Organic        | O1                 | F    | root; cellular organisms; [SK] Eukaryota; Opisthokonta; [K] Fungi; Dikarya; [P] Ascomycota;                                                                                                                                                                                                                           |
| 56 | KY430505 | 20 | 67608    | Microdochium                | Endophyte-Plant Pathogen                                                                 | Pathotroph-Symbiotroph            | Conventional   | C2                 | F    | root; cellular organisms; [SK] Eukaryota; Opisthokonta; [K] Fungi; Dikarya; [P] Ascomycota; saccharomyceta; Pezizomycotina; leotiomyceta; sordariomyceta; [C] Sordariomycetes; Xylariomycetidae; [O] Xylariales; [F] Microdochiaceae; [G] Microdochium;                                                               |
| 57 | KY430506 | 20 | 67608    | Microdochium                | Endophyte-Plant Pathogen                                                                 | Pathotroph-Symbiotroph            | Conventional   | C2                 | E    | root; cellular organisms; [SK] Eukaryota; Opisthokonta; [K] Fungi; Dikarya; [P] Ascomycota; saccharomyceta; Pezizomycotina; leotiomyceta; sordariomyceta; [C] Sordariomycetes; Xylariomycetidae; [O] Xylariales; [F] Microdochiaceae; [G] Microdochium;                                                               |
| 58 | KY430507 | 20 | 67608    | Microdochium                | Endophyte-Plant Pathogen                                                                 | Pathotroph-Symbiotroph            | Conventional   | C2                 | E    | root; cellular organisms; [SK] Eukaryota; Opisthokonta; [K] Fungi; Dikarya; [P] Ascomycota; saccharomyceta; Pezizomycotina; leotiomyceta; sordariomyceta; [C] Sordariomycetes; Xylariomycetidae; [O] Xylariales; [F] Microdochiaceae; [G] Microdochium;                                                               |
| 59 | KY430508 | 20 | 67608    | Microdochium                | Endophyte-Plant Pathogen                                                                 | Pathotroph-Symbiotroph            | Conventional   | C2                 | H    | root; cellular organisms; [SK] Eukaryota; Opisthokonta; [K] Fungi; Dikarya; [P] Ascomycota; saccharomyceta; Pezizomycotina; leotiomyceta; sordariomyceta; [C] Sordariomycetes; Xylariomycetidae; [O] Xylariales; [F] Microdochiaceae; [G] Microdochium;                                                               |
| 60 | KY430510 | 22 | 1577007  | Slopeiomyces cylindrosporus | Plant Pathogen                                                                           | Pathotroph-Symbiotroph            | Conventional   | O3                 | I    | root; cellular organisms; [SK] Eukaryota; Opisthokonta; [K] Fungi; Dikarya; [P] Ascomycota; saccharomyceta; Pezizomycotina; leotiomyceta; sordariomyceta; [C] Sordariomycetes; Xylariomycetidae; [O] Xylariales; [F] Microdochiaceae; [G] Microdochium;                                                               |
| 61 | KY430510 | 22 | 67608    | Microdochium                | Endophyte-Plant Pathogen                                                                 | Pathotroph-Symbiotroph            | Organic        | O3                 | I    | root; cellular organisms; [SK] Eukaryota; Opisthokonta; [K] Fungi; Dikarya; [P] Ascomycota; saccharomyceta; Pezizomycotina; leotiomyceta; sordariomyceta; [C] Sordariomycetes; Xylariomycetidae; [O] Xylariales; [F] Microdochiaceae; [G] Microdochium;                                                               |
| 62 | KY430511 | 22 | 67608    | Microdochium                | Endophyte-Plant Pathogen                                                                 | Pathotroph-Symbiotroph            | Organic        | O1                 | F    | root; cellular organisms; [SK] Eukaryota; Opisthokonta; [K] Fungi; Dikarya; [P] Ascomycota; saccharomyceta; Pezizomycotina; leotiomyceta; sordariomyceta; [C] Sordariomycetes; Xylariomycetidae; [O] Xylariales; [F] Microdochiaceae; [G] Microdochium;                                                               |
| 63 | KY430512 | 19 | 252155   | Schizothecium               | Dung Saprotroph                                                                          | Saprotroph                        | Conventional   | C3                 | J    | root; cellular organisms; [SK] Eukaryota; Opisthokonta; [K] Fungi; Dikarya; [P] Ascomycota; saccharomyceta; Pezizomycotina; leotiomyceta; sordariomyceta; [C] Sordariomycetes; Sordariomycetidae; [O] Sordariales; [F] Lasiosphaeriaceae; [G] Schizothecium;                                                          |
| 64 | KY430514 | 20 | 67608    | Microdochium                | Endophyte-Plant Pathogen                                                                 | Pathotroph-Symbiotroph            | Organic        | O3                 | A    | root; cellular organisms; [SK] Eukaryota; Opisthokonta; [K] Fungi; Dikarya; [P] Ascomycota; saccharomyceta; Pezizomycotina; leotiomyceta; sordariomyceta; [C] Sordariomycetes; Xylariomycetidae; [O] Xylariales; [F] Microdochiaceae; [G] Microdochium;                                                               |
| 65 | KY430515 | 9  | 231204   | Leucosporidium goulbevii    | -                                                                                        | -                                 | Organic        | O3                 | I    | root; cellular organisms; [SK] Eukaryota; Opisthokonta; [K] Fungi; Dikarya; [P] Basidiomycota; Pucciniomycotina; [C] Microbotryomycetes; [O] Leucosporidiales; [F] Leucosporidiaceae; [G] Leucosporidium; [S] Leucosporidium goulbevii;                                                                               |
| 66 | KY430516 | 20 | 67608    | Microdochium                | Endophyte-Plant Pathogen                                                                 | Pathotroph-Symbiotroph            | Organic        | O3                 | H    | root; cellular organisms; [SK] Eukaryota; Opisthokonta; [K] Fungi; Dikarya; [P] Ascomycota; saccharomyceta; Pezizomycotina; leotiomyceta; sordariomyceta; [C] Sordariomycetes; Xylariomycetidae; [O] Xylariales; [F] Microdochiaceae; [G] Microdochium;                                                               |
| 67 | KY430517 | 21 | 97971    | Periconia                   | Endophyte-Plant Pathogen-Wood Saprotroph                                                 | Pathotroph-Saprotroph-Symbiotroph | Organic        | O3                 | G    | root; cellular organisms; [SK] Eukaryota; Opisthokonta; [K] Fungi; Dikarya; [P] Ascomycota; saccharomyceta; Pezizomycotina; leotiomyceta; dothideomyceta; [C] Dothideomycetes; Pleosporomycetidae; [O] Pleosporales; Massarinaceae; [F] Periconiaceae; [G] Periconia;                                                 |
| 68 | KY430518 | 7  | 4890     | Ascomycota                  | -                                                                                        | -                                 | Organic        | O3                 | G    | root; cellular organisms; [SK] Eukaryota; Opisthokonta; [K] Fungi; Dikarya; [P] Ascomycota;                                                                                                                                                                                                                           |
| 69 | KY430519 | 12 | 1577007  | Slopeiomyces cylindrosporus | Plant Pathogen                                                                           | Pathotroph                        | Organic        | O2                 | I    | root; cellular organisms; [SK] Eukaryota; Opisthokonta; [K] Fungi; Dikarya; [P] Ascomycota; saccharomyceta; Pezizomycotina; leotiomyceta; sordariomyceta; [C] Sordariomycetes; Sordariomycetidae; [O] Magnaporthales; [F] Magnaporthaceae; [G] Slopeiomyces; [S] Slopeiomyces cylindrosporus;                         |
| 70 | KY430520 | 20 | 67608    | Microdochium                |                                                                                          |                                   |                |                    |      |                                                                                                                                                                                                                                                                                                                       |
