# Supplementary material for: Belowground fungal community diversity, composition and ecological functionality associated with winter wheat in conventional and organic agricultural systems
Source: PeerJ. 2020 Oct 13;8:e9732. doi: 10.7717/peerj.9732 (PMC7566770; doi:10.7717/peerj.9732)
Supplement: Supplemental Information 5 — Raw Data for all plots, two replicates per plot were averaged for Table S3 and subsequent analysis. [file peerj-08-9732-s005.xlsx]

## Sheet: Sheet1
Plot ID	pHCaCl2	CaCO3 [%]	Nt [%]	Ct [%]	St [%]	Corg [%]	Kcal [mg/kg]	Pcal [mg/kg]	C/N
C1 A	6.34	nd	0.178318	1.74649	0.0366558	1.74649	219.231	69.5931	9.79429
C1 B	6.01	nd	0.158771	1.41712	0.0328833	1.41712	212.55	36.9165	8.92556
C2 A	6.74	nd	0.183798	1.89484	0.0365674	1.89484	168.436	81.4618	10.3094
C2 B	6.94	1.45809	0.17044	1.66132	0.0343182	1.48635	211.613	40.9937	9.74729
C3 A	7.18	9.34527	0.245069	3.09132	0.0341638	1.96989	487.729	125.194	12.6141
C3 B	7.28	9.36128	0.218014	2.72129	0.0409176	1.59793	399.834	129.843	12.4822
C4 A	6.45	nd	0.149185	1.40574	0.030416	1.40574	203.227	44.4751	9.4228
C4 B	6.85	1.22892	0.17294	1.61153	0.0371772	1.46406	242.313	37.976	9.31842
C5 A	7.22	9.11306	0.262072	3.16611	0.0422603	2.07254	582.011	123.353	12.0811
C5 B	7.26	10.33	0.220413	2.94896	0.0416458	1.70936	377.28	130.079	13.3792
O1 A	7.23	10.8428	0.245554	4.10516	0.0436434	2.80402	320.2	174.758	16.7179
O1 B	7.33	17.5213	0.156601	3.34452	0.0359636	1.24197	150.712	95.7281	21.3569
O2 A	7.26	19.4277	0.220243	4.98013	0.0444607	2.64881	327.549	92.6173	22.612
O2 B	7.29	10.7659	0.199006	3.13061	0.0363304	1.8387	178.017	121.559	15.7312
O3 A	7.33	14.0075	0.282799	4.44661	0.0525634	2.7657	249.532	141.609	15.7236
O3 B	7.41	7.75548	0.226986	3.29474	0.0416057	2.36408	62.9468	143.551	14.5152
O4 A	7.15	10.8447	0.25746	4.04981	0.0421343	2.74845	376.344	289.806	15.7298
O4 B	7.27	10.1007	0.185046	3.32951	0.0341345	2.11742	288.283	197.923	17.9929
O5 A	7.37	11.5508	0.24224	3.87769	0.052313	2.4916	202.618	120.428	16.0077
O5 B	7.48	4.16134	0.201373	2.95674	0.036894	2.45738	63.2836	146.388	14.6829
